# Supplementary material for: Enzymatically cross-linked peptide hydrogels for enhanced self-assembling capability and controlled drug release
Source: Royal Society of Chemistry journal article supplement (doi:10.1039/d2nj06256a), 2023-01-01
Supplement: d2nj06256a1.pdf [file d2nj06256a1.pdf]

**Electronic Supporting Information (ESI)**

**Enzymatically-cross-linked peptide hydrogels for enhanced self-assembling capability and controlled drug release**

*Xiujie Wang, <sup>a</sup> Guoru Dai, <sup>a</sup> Bianli Cheng, <sup>a</sup> Jing Xu, <sup>a</sup> Keming Xu, <sup>ab\*</sup> Wenying Zhong<sup>\*abc</sup>*

<sup>a</sup> Department of Chemistry, China Pharmaceutical University, Nanjing 210009, China.

<sup>b</sup> Key Laboratory of Biomedical Functional Materials, China Pharmaceutical University, Nanjing 210009, China.

<sup>c</sup> Key Laboratory of Drug Quality Control and Pharmacovigilance, China Pharmaceutical University, Nanjing 210009, China.

\*E-mail: [wyzhong@cpu.edu.cn](mailto:wyzhong@cpu.edu.cn); \*E-mail: [kmxu@cpu.edu.cn](mailto:kmxu@cpu.edu.cn).

## Table of Contents

**Scheme S1** The HRP-mediated catalytic cycle of Tyr.

**Fig. S1** Structural characterizations of Fmoc-GFYF. (A) HPLC; (B) MS; (C) <sup>1</sup>H NMR.

**Fig. S2** The secondary conformations of the Fmoc-GFYF (A) and Fmoc-GFYF/enzymatically cross-linked hydrogels (B).

**Fig. S3** Frequency sweep of Fmoc-GFYF/enzymatically cross-linked hydrogel.

**Fig. S4** Cyclic strain sweep of Fmoc-GFYF/enzymatically cross-linked hydrogel.

**Fig. S5** Recovery test and injectability of Fmoc-GFYF/enzymatically cross-linked hydrogel. (A) (B) Gel images of hydrogel before (A) and after vortex (B); (C) Letter writing of “CPU” with the hydrogel with a syringe.

**Fig. S6** Time lapse study of rheology for the Fmoc-GFYF/enzymatically cross-linked hydrogel. (A) Fmoc-GFYF+H<sub>2</sub>O<sub>2</sub>+HRP; (B) Fmoc-GFYF without enzyme treatment.

**Fig. S7** HPLC spectrograms of Fmoc-GFYF (A) and Fmoc-GFYF+H<sub>2</sub>O<sub>2</sub>+HRP (B) at 0, 4, 8, and 24 h.

**Fig. S8** (A) HPLC spectrogram of Fmoc-GFYF+H<sub>2</sub>O<sub>2</sub>+HRP; (B) MS analysis of main peak (13.7 min, m/z is 771 ([M+H]<sup>+</sup>)); (C) MS analysis of main peak (15.9 min, m/z is 1538 ([M+H]<sup>+</sup>)).

**Fig. S9** The absorption spectra of Fmoc-GFFY and Fmoc-GFFG before and after enzymatic crosslinking with the concentration of H<sub>2</sub>O<sub>2</sub> changing from 250 to 1000 μM. (A) Fmoc-GFFY; (B) Fmoc-GFFG.

**Fig. S10** Remaining mass of Fmoc-GFYF and Fmoc-GFYF+H<sub>2</sub>O<sub>2</sub>+HRP hydrogels after 24 or 48 h treatment of 10 U/mL proteinase K.

**Fig. S11** Cellular uptake of DOX in A549 cells after 2 h treatment of DOX solution or Fmoc-GFYF+H<sub>2</sub>O<sub>2</sub>+HRP/DOX.

**Fig. S12** Cellular uptake of DOX in Fmoc-GFYY+H<sub>2</sub>O<sub>2</sub>+HRP/DOX-treated cells at 4 °C or 37°C receiving pretreatment of various endocytosis inhibitors.

**Table S1** The parameters calculated in the Ritger-Peppas model for 24 h drug release of DOX from Fmoc-GFYY or Fmoc-GFYY+H<sub>2</sub>O<sub>2</sub>+HRP hydrogels.

**Table S2** Values of IC<sub>50</sub> in A549 for DOX, Fmoc-GFYY/DOX and Fmoc-GFYY+H<sub>2</sub>O<sub>2</sub>+HRP/DOX.

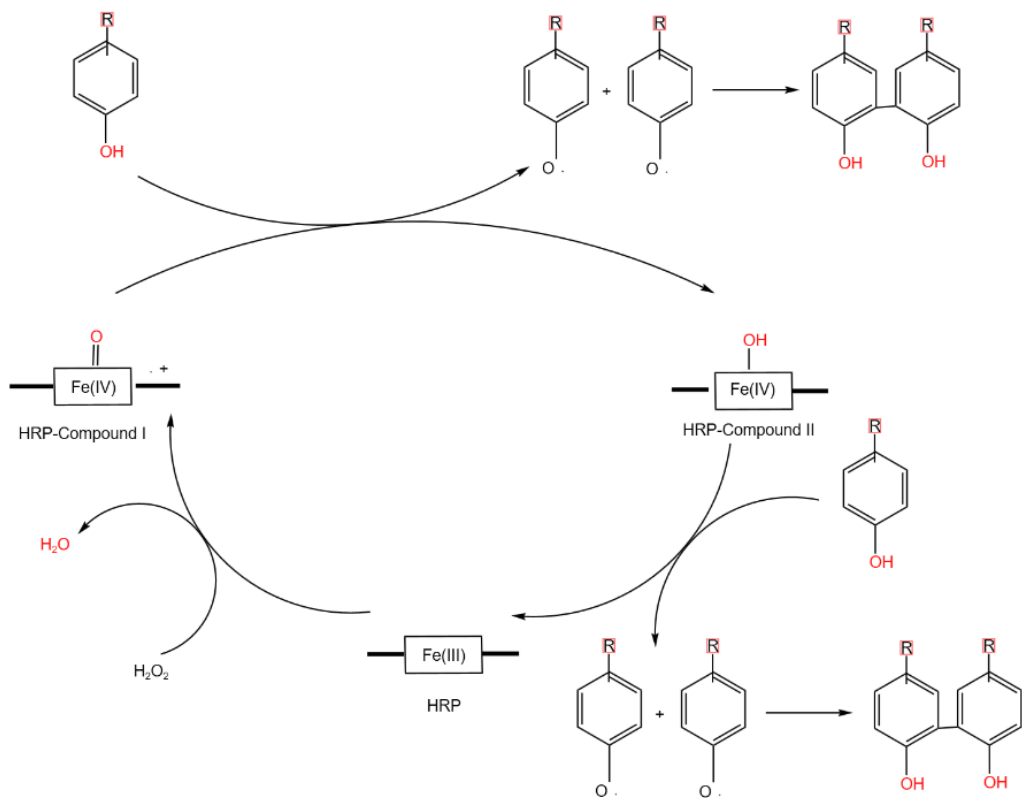

**Scheme S1** The HRP-mediated catalytic cycle of Tyr.

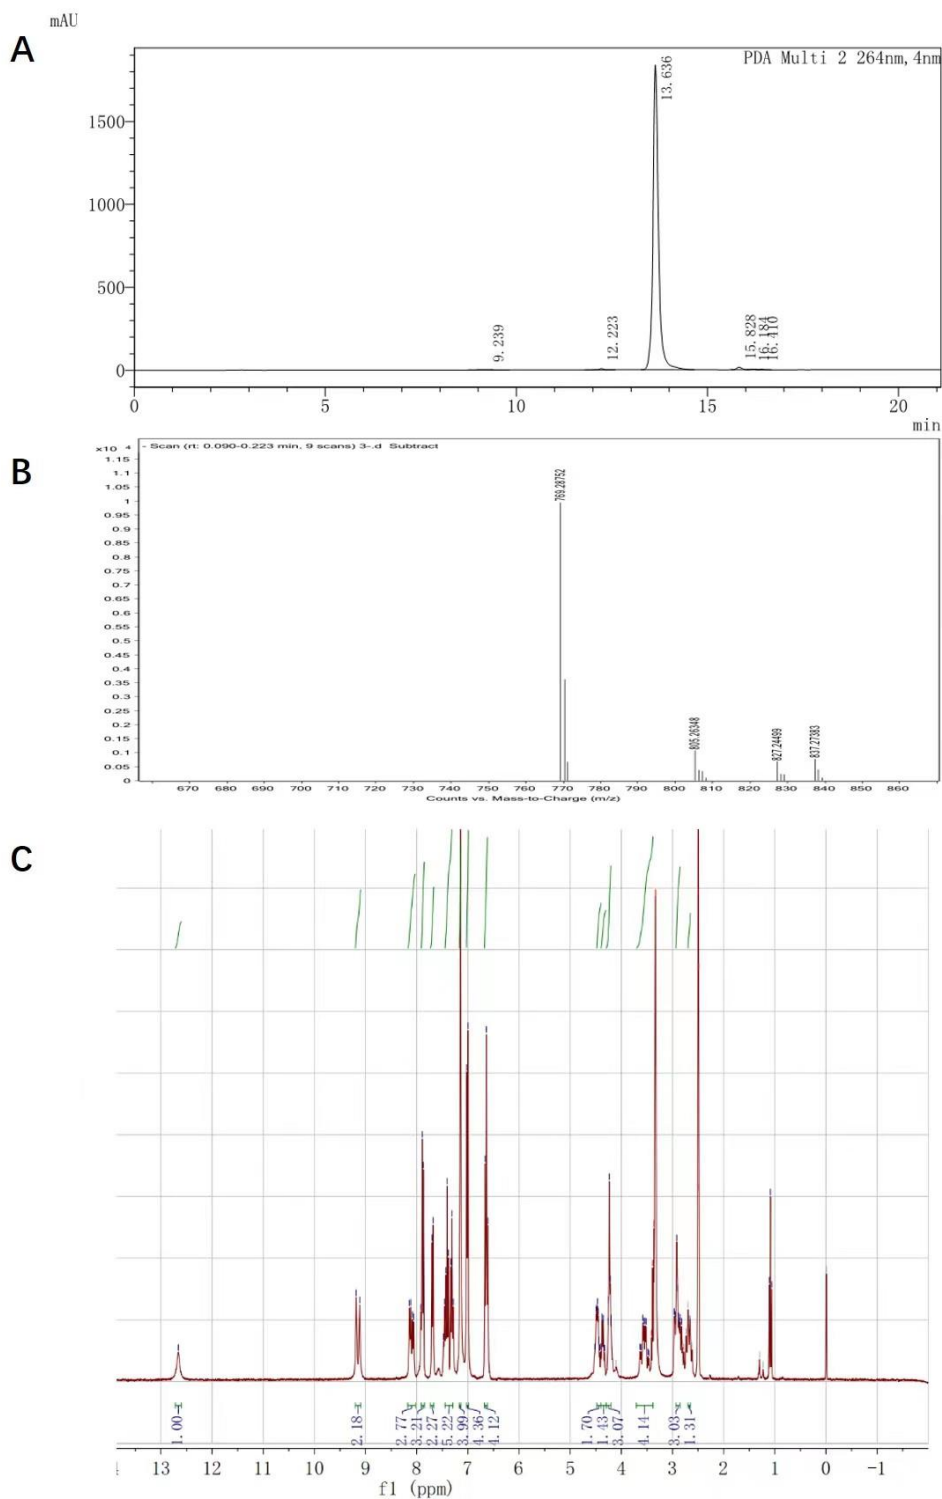

**Fig. S1** Structural characterizations of Fmoc-GFYF. (A) HPLC; (B) MS; (C) <sup>1</sup>H NMR. Fmoc-GFYF(C<sub>44</sub>H<sub>42</sub>N<sub>4</sub>O<sub>9</sub>) <sup>1</sup>H NMR (300 MHz, DMSO-d<sub>6</sub>) δ 12.66 (s, 1H), 9.15 (d, J = 20.0 Hz, 2H), 8.10 (dd, J = 17.7, 7.9 Hz, 3H), 7.88 (d, J = 7.3 Hz, 3H), 7.69 (d, J = 7.4 Hz, 2H), 7.44 – 7.30 (m, 5H), 7.15 (s, 4H), 7.01 (d, J = 8.2 Hz, 4H), 6.65 (d, J = 8.4 Hz, 4H), 4.44 (dd, J = 14.7, 5.7 Hz, 2H), 4.40 – 4.30 (m, 1H), 4.24 (q, J = 5.6, 4.3 Hz, 3H), 3.55 (qd, J = 16.9, 6.0 Hz, 4H), 2.93 – 2.85 (m, 3H), 2.66 (s, 1H).

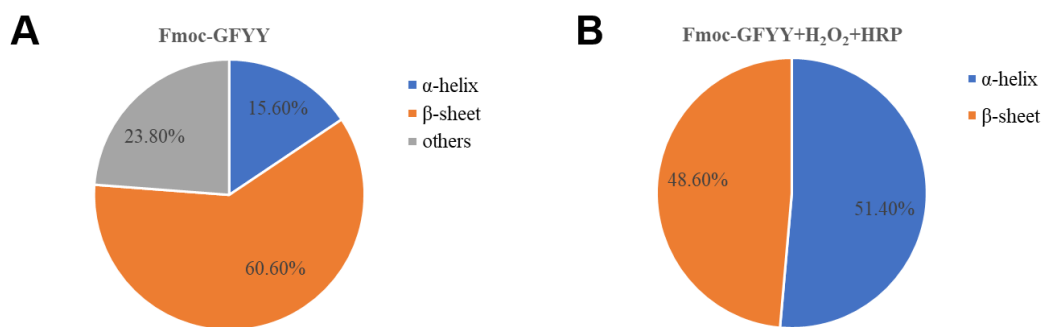

**Fig. S2** The secondary conformations of the Fmoc-GFYF (A) and Fmoc-GFYF/enzymatically cross-linked hydrogels (B).

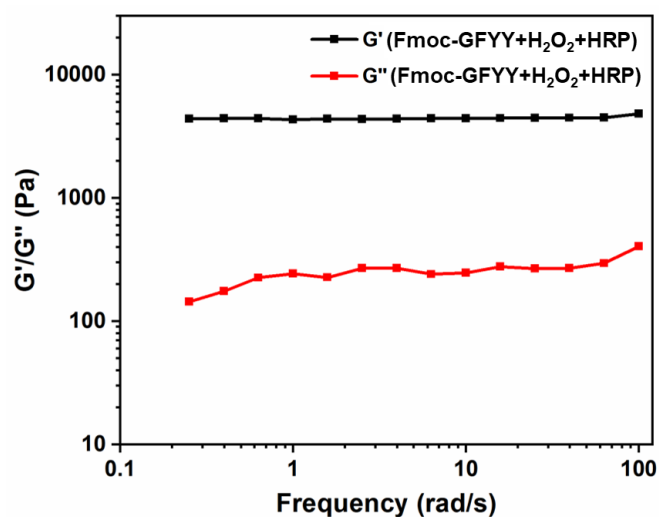

**Fig. S3** Frequency sweep of Fmoc-GFYF/enzymatically cross-linked hydrogel.

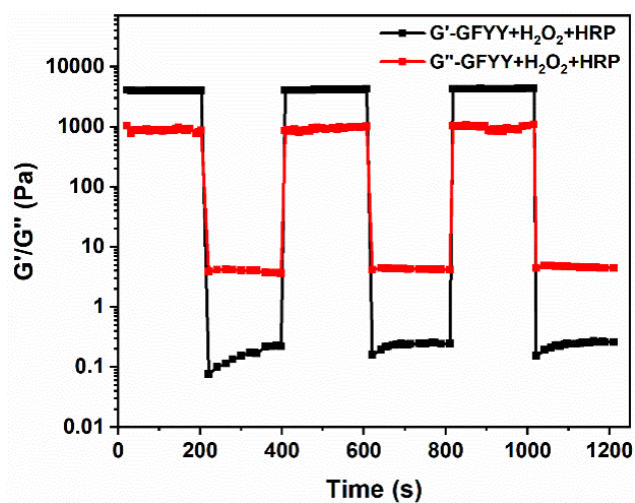

**Fig. S4** Cyclic strain sweep of Fmoc-GFYF/enzymatically cross-linked hydrogel.

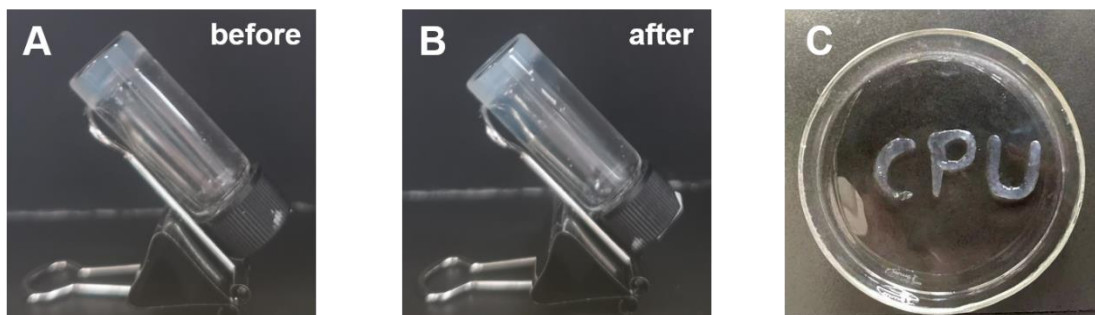

**Fig. S5** Recovery test and injectability of Fmoc-GFYF/enzymatically cross-linked hydrogel. (A) (B) Gel images of hydrogel before (A) and after vortex (B); (C) Letter writing of “CPU” with the hydrogel with a syringe.

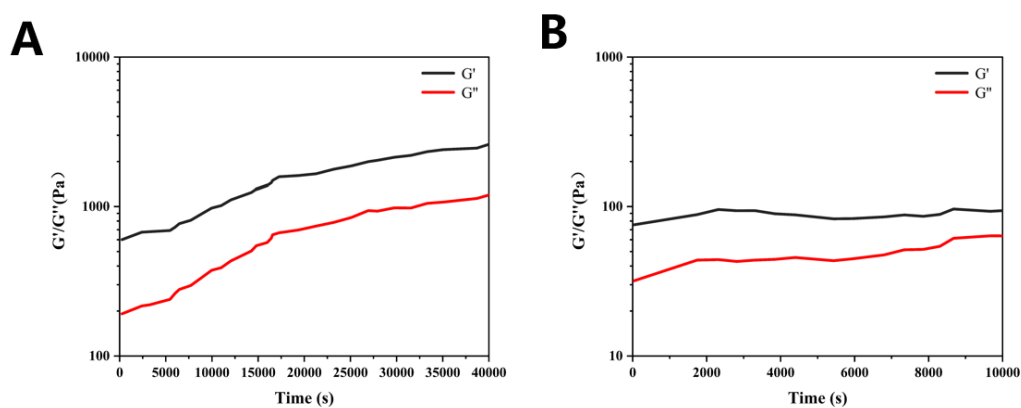

**Fig. S6** Time lapse study of rheology for the Fmoc-GFYF/enzymatically cross-linked hydrogel. (A) Fmoc-GFYF + H<sub>2</sub>O<sub>2</sub> + HRP; (B) Fmoc-GFYF without enzyme treatment.

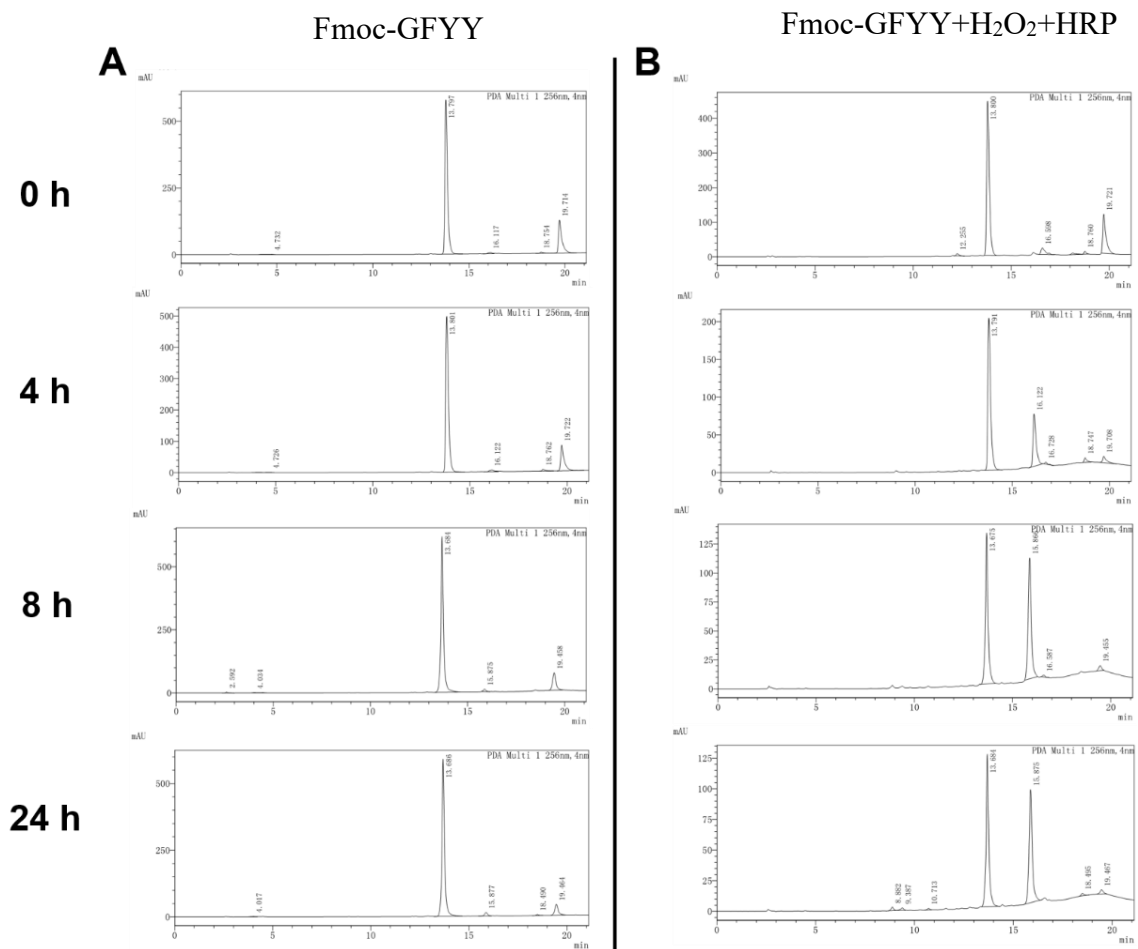

**Fig. S7** HPLC spectrograms of Fmoc-GFYF (A) and Fmoc-GFYF+H<sub>2</sub>O<sub>2</sub>+HRP (B) at 0, 4, 8, and 24 h.



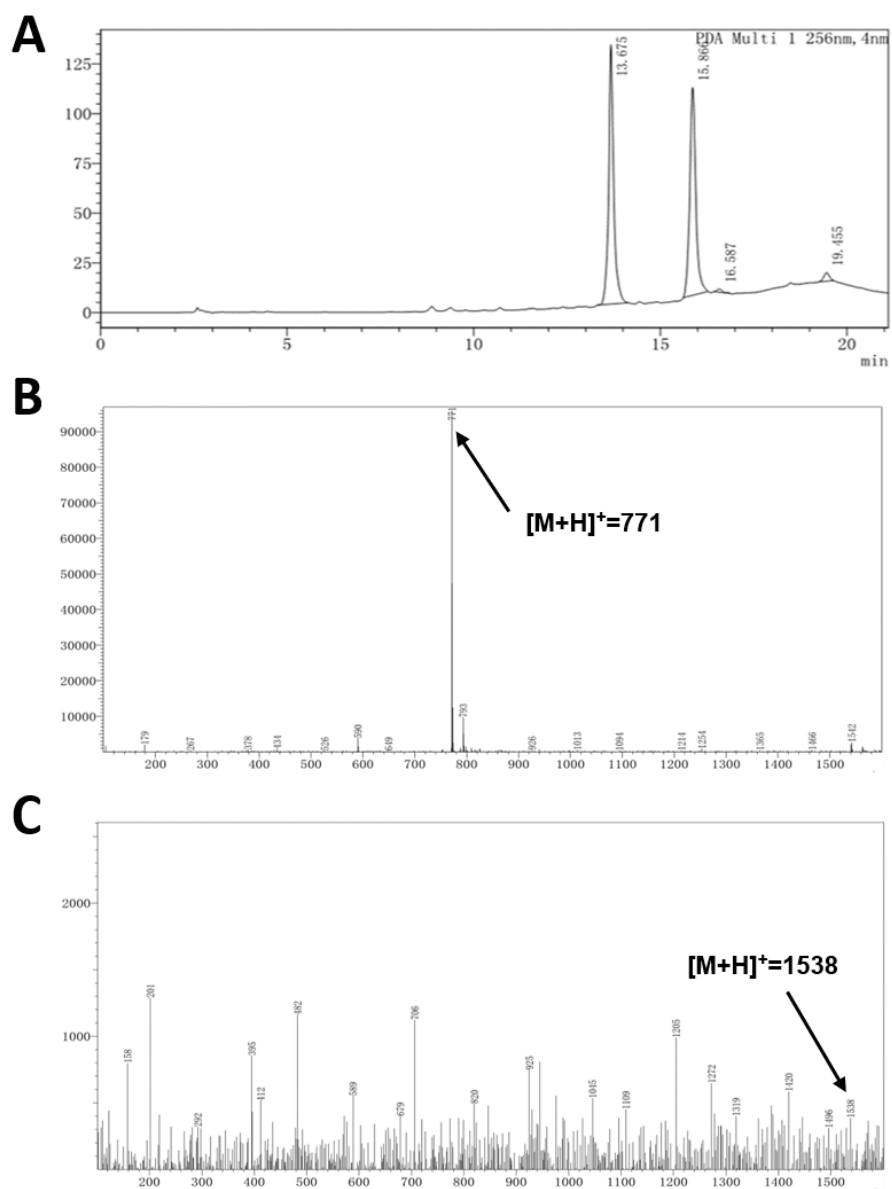

**Fig. S8** (A) HPLC spectrogram of Fmoc-GFYH+H<sub>2</sub>O<sub>2</sub>+HRP; (B) MS analysis of main peak (13.7 min, m/z is 771 ([M+H]<sup>+</sup>)); (C) MS analysis of main peak (15.9 min, m/z is 1538 ([M+H]<sup>+</sup>)).

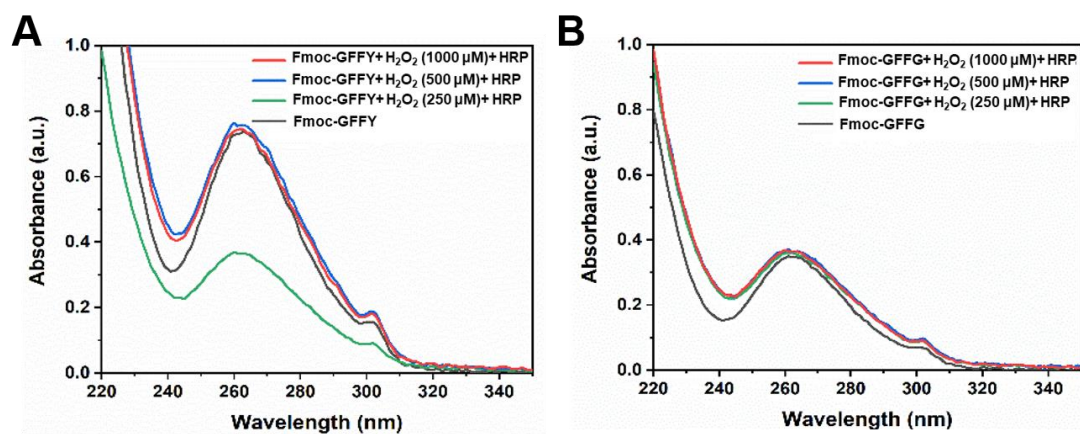

**Fig. S9** The absorption spectra of Fmoc-GFFY and Fmoc-GFFG before and after enzymatic crosslinking with the concentration of H<sub>2</sub>O<sub>2</sub> changing from 250 μM to 1000 μM. (A) Fmoc-GFFY; (B) Fmoc-GFFG.

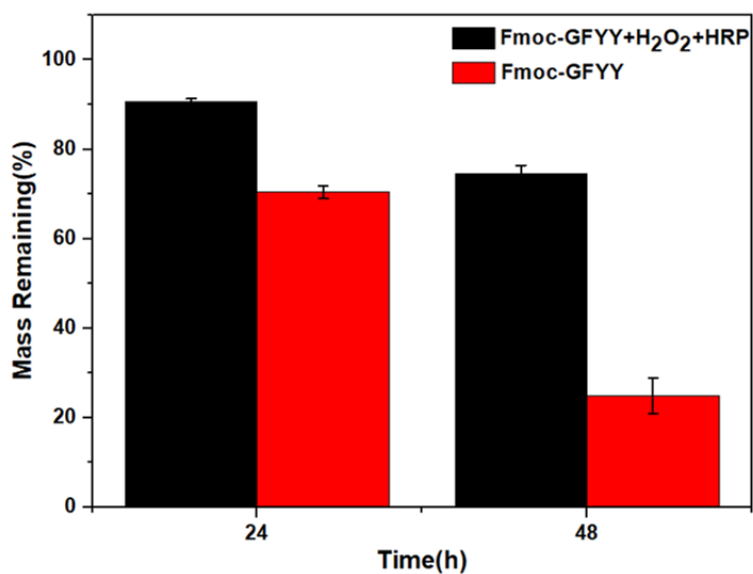

**Fig. S10** Remaining mass of Fmoc-GFY and Fmoc-GFY+H<sub>2</sub>O<sub>2</sub>+HRP hydrogels after 24 or 48 h treatment of 10 U/mL proteinase K.

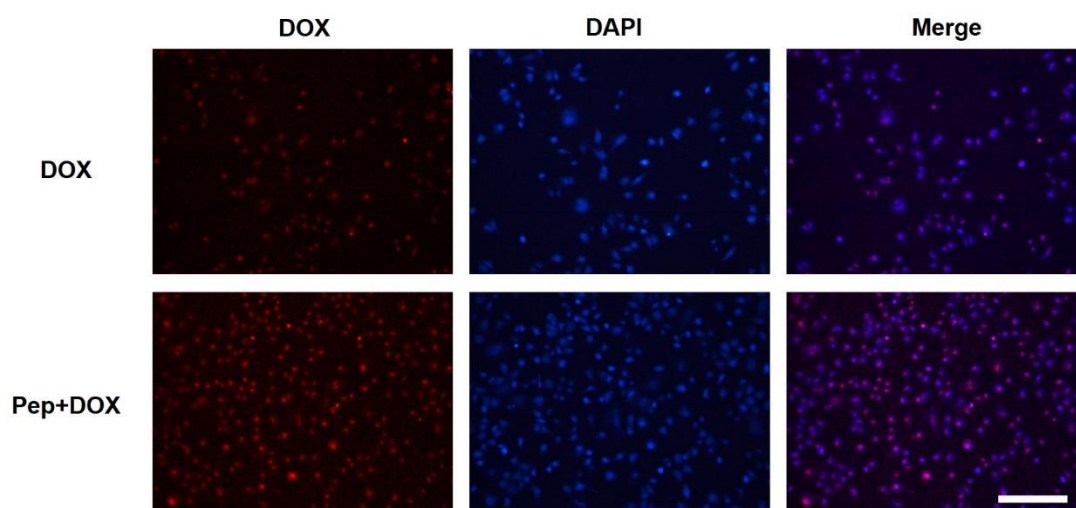

**Fig. S11** Cellular uptake of DOX in A549 cells after 2 h treatment of DOX solution or Fmoc-GFYF+H<sub>2</sub>O<sub>2</sub>+HRP/DOX. Fmoc-GFYF, 300 μM; DOX, 10 μg/mL. Scale bar, 100 μm.

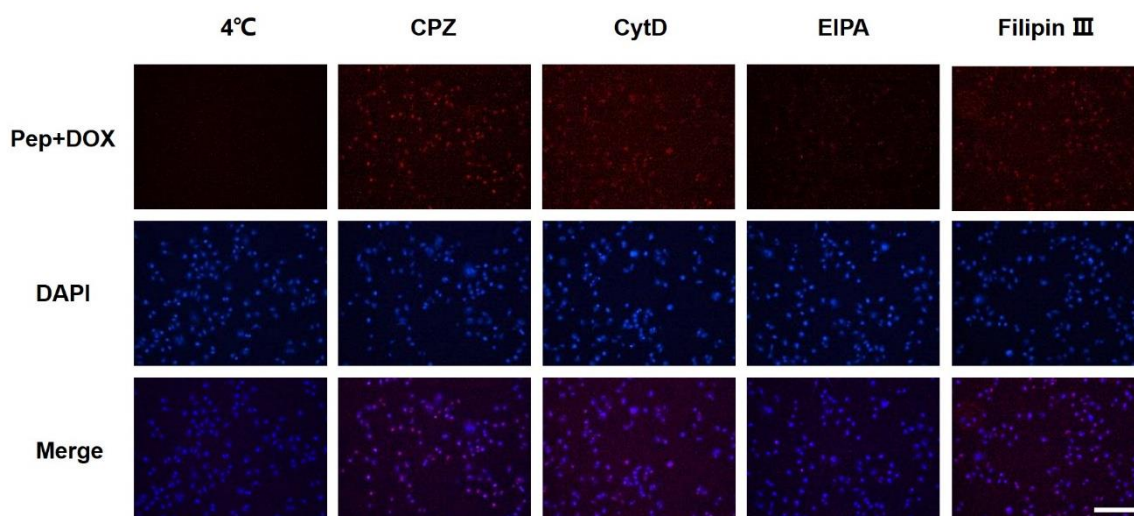

**Fig. S12** Cellular uptake of DOX in Fmoc-GFYF+H<sub>2</sub>O<sub>2</sub>+HRP/DOX-treated cells at 4 °C or 37°C receiving pretreatment of various endocytosis inhibitors. Fmoc-GFYF, 300 μM; DOX, 10 μg/mL. Scale bar, 100 μm.

**Table S1** The parameters calculated in Ritger-Peppas modelling of 24 h drug release of DOX from Fmoc-GFYY or Fmoc-GFYY+H<sub>2</sub>O<sub>2</sub>+HRP hydrogels.

| Formulation                                  | n    | K    | R <sup>2</sup> |
|----------------------------------------------|------|------|----------------|
| Fmoc-GFYY                                    | 0.76 | 2.93 | 0.8656         |
| Fmoc-GFYY+H <sub>2</sub> O <sub>2</sub> +HRP | 0.70 | 0.70 | 0.8562         |

**Table S2** Values of IC<sub>50</sub> in A549 for DOX, Fmoc-GFYY/DOX and Fmoc-GFYY+H<sub>2</sub>O<sub>2</sub>+HRP/DOX.

| Formulation                                      | IC <sub>50</sub> (ng/mL) |
|--------------------------------------------------|--------------------------|
| DOX                                              | 542 ± 43                 |
| Fmoc-GFYY/DOX                                    | 258 ± 24***              |
| Fmoc-GFYY+H <sub>2</sub> O <sub>2</sub> +HRP/DOX | 386 ± 23**               |

Note. Results are shown as the mean values ± standard deviation (n = 3).

IC<sub>50</sub> of Fmoc-GFYY/DOX and Fmoc-GFYY+H<sub>2</sub>O<sub>2</sub>+HRP/DOX were significantly different from DOX. (\*\*,  $P < 0.01$ ; \*\*\*,  $P < 0.001$ .)
